# Supplementary material
Source: publisher site journal article supplement (https://www.spandidos-publications.com/5896/downloadSupplementary)

Figure S1. Quality assessment of the included studies using the Newcastle-Ottawa scale. «, the study satisfied the item; -, the study did not satisfy the item; RE, representativeness of the exposed; SNE, selection of the non-exposed; AE, ascertainment of exposure; DON, demonstration that outcome of interest was not present at start; SC, study controls for age, sex; SCA, study controls for any additional factors (chemoradiotherapy, curative resection and drug resistance); AO, assessment of outcome; FUL, follow-up time >36 months; AFU, adequacy of follow-up of cohorts.

| Study             | Selection |     |    |     | Comparability |     | Outcome |     |     | TOTAL | Quality  |
|-------------------|-----------|-----|----|-----|---------------|-----|---------|-----|-----|-------|----------|
|                   | RE        | SNE | AE | DON | SC            | SCA | AO      | FUL | AFU |       |          |
| Yoo 2022          | ★         | ★   | ★  | ★   | -             | -   | ★       | ★   | ★   | 7     | High     |
| Tateishi 2021     | ★         | ★   | ★  | ★   | -             | -   | ★       | ★   | ★   | 7     | High     |
| Esposito 2021     | ★         | ★   | ★  | ★   | -             | -   | ★       | -   | ★   | 6     | Moderate |
| Collet 2021       | ★         | ★   | ★  | ★   | -             | -   | ★       | ★   | ★   | 7     | High     |
| Martini(1) 2021   | ★         | ★   | ★  | ★   | -             | -   | ★       | ★   | ★   | 7     | High     |
| Martini(2) 2021   | ★         | ★   | ★  | ★   | -             | -   | ★       | ★   | ★   | 7     | High     |
| Ahmed 2021        | ★         | ★   | ★  | ★   | -             | -   | ★       | ★   | ★   | 7     | High     |
| Young 2020        | ★         | ★   | ★  | ★   | -             | -   | ★       | ★   | ★   | 7     | High     |
| Di Filippo 2020   | ★         | ★   | ★  | ★   | -             | -   | ★       | ★   | ★   | 7     | High     |
| Labadie 2019      | ★         | ★   | ★  | ★   | -             | -   | ★       | -   | ★   | 6     | Moderate |
| Kichenadasse 2019 | ★         | ★   | ★  | ★   | -             | -   | ★       | -   | ★   | 6     | Moderate |
| Donnelly 2019     | ★         | ★   | ★  | ★   | -             | -   | ★       | ★   | ★   | 7     | High     |
| De Giorgi 2019    | ★         | ★   | ★  | ★   | -             | -   | ★       | -   | ★   | 6     | Moderate |
| Cortellini 2019   | ★         | ★   | ★  | ★   | -             | -   | ★       | ★   | ★   | 7     | High     |
| McQuade 2018      | ★         | ★   | ★  | ★   | -             | -   | ★       | ★   | ★   | 7     | High     |

Figure S2. Sensitivity analysis of the association between BMI (<25 and  $\geq$ 25 kg/m<sup>2</sup> groups) and survival in patients with cancer receiving immunotherapy. BMI, body mass index; IV, inverse variance; PFS, progression-free survival; OS, overall survival.

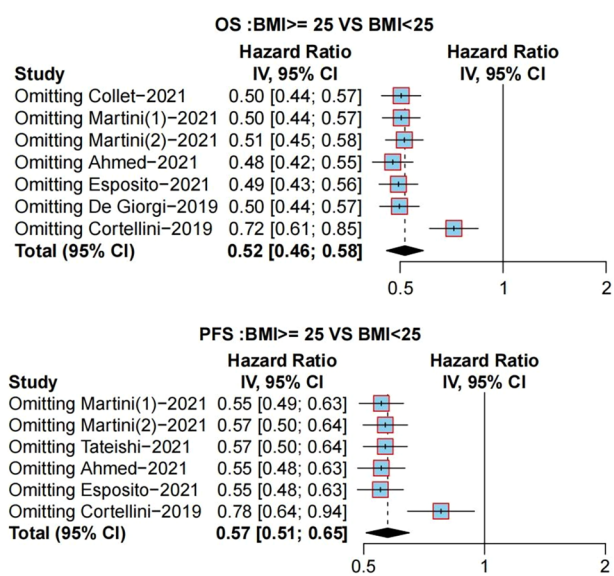

Figure S3. Sensitivity analysis of the association between BMI (overweight, obese and normal groups) and OS in patients with cancer receiving immunotherapy. BMI, body mass index; IV, inverse variance; OS, overall survival.

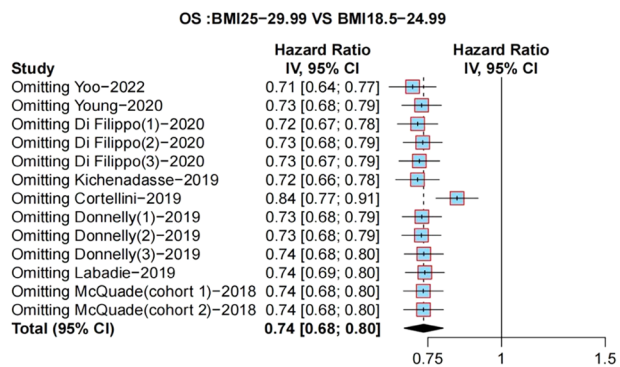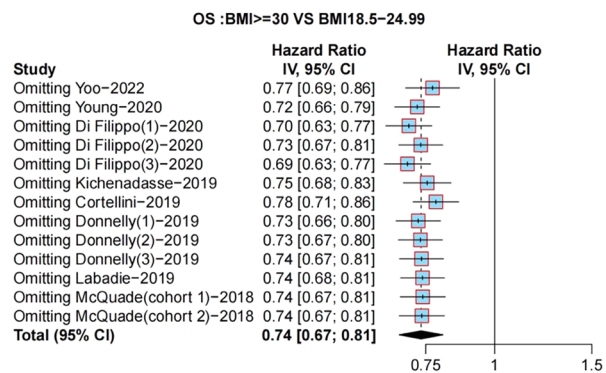

Figure S4. Sensitivity analysis of the association between BMI (overweight, obese and normal groups) and PFS in patients with cancer receiving immunotherapy. BMI, body mass index; IV, inverse variance; PFS, progression-free survival.

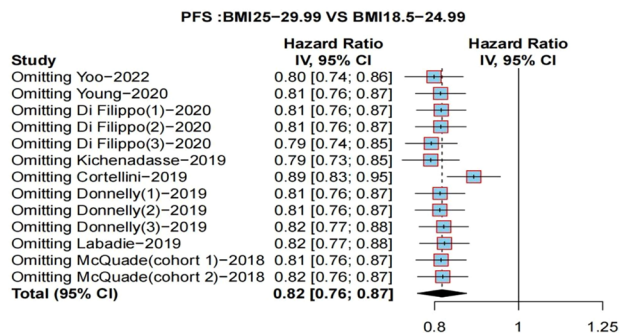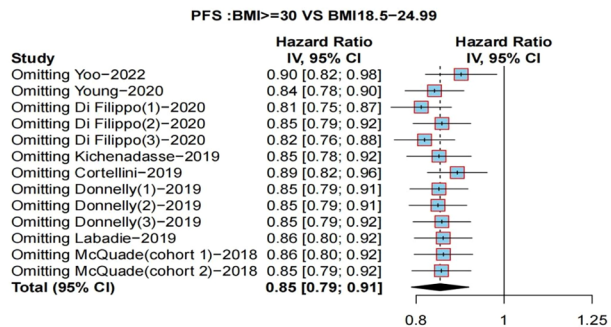

Supplement: Supplementary file 1 [file downloadSupplementary]
